# Supplementary material for: RCP induces FAK phosphorylation and ovarian cancer cell invasion with inhibition by curcumin
Source: PubMed Central journal article supplement — Exp Mol Med. 2018 Apr 27;50(4):52. doi: 10.1038/s12276-018-0078-1 (PMC5938006; doi:10.1038/s12276-018-0078-1), 2018-04-27
Supplement: 12276_2018_78_MOESM5_ESM.pdf [file 12276_2018_78_MOESM5_ESM.pdf]

**Supplementary Figure 1** FAK is important for RCP-induced Slug expression. SKOV-3 cells were transfected with the indicated vectors for 48 h followed by treatment with PF573228 (10  $\mu$ M) for 1 h. Immunoblotting. All experiments were repeated three times.

**Supplementary Figure 2** FAK is critical for RCP-induced ovarian cancer cell invasion. (a) PA-1 cells were transfected with the indicated vectors for 48 h followed by treatment with PF573228 (10  $\mu$ M) for 1 h. Invasion assays (mean  $\pm$ s.d. \* $P$ <0.05 versus the control vector, # $P$ <0.05 versus RCP overexpression only). Original magnification,  $\times$ 200; scale bar, 200  $\mu$ m. (b) PA-1 cells were co-transfected with indicated vectors and siRNAs for 48 h. Invasion assays (mean  $\pm$ s.d. \*\* $P$ <0.01 versus the control vector, ### $P$ <0.01 versus RCP overexpression with scrambled siRNA). Original magnification,  $\times$ 200; scale bar, 200  $\mu$ m. All experiments were repeated three times.

**Supplementary Figure 3** Cell viability with curcumin. The viability of SKOV-3 cells was analyzed as described using concentrations of curcumin as indicated for 24 h. Representative results are presented from at least five independent experiments with similar results.

**Supplementary Figure 4** Cell viability with curcumin and DOX. The viability of SKOV-3 cells was analyzed as described using concentrations of curcumin and DOX as indicated for 24 h. Representative results are presented from at least five independent experiments with similar results.
